# Supplementary material for: Multifactorial engineering of biomimetic membranes for batteries with multiple high-performance parameters
Source: PubMed Central journal article supplement (PMC8755825; doi:10.1038/s41467-021-27861-w), 2022-01-12
Supplement: 41467_2021_27861_MOESM1_ESM.pdf [file 41467_2021_27861_MOESM1_ESM.pdf]

## Supplementary Information

# Multifactorial engineering of biomimetic membranes for batteries with multiple high-performance parameters

Mingqiang Wang<sup>1,2,3,ϕ</sup>, Ahmet Emre<sup>2,3,4,5,ϕ</sup>, Ji-Young Kim<sup>2,3,4</sup>, Yiting Huang<sup>1</sup>, Li Liu<sup>1</sup>, Volkan Cecen<sup>2,3</sup>, Yudong Huang<sup>1</sup>, Nicholas A. Kotov<sup>2,3,4,5,\*</sup>

<sup>1</sup> School of Chemistry and Chemical Engineering, Harbin Institute of Technology, Harbin 150001, P. R. China;

<sup>2</sup> Department of Chemical Engineering, University of Michigan, Ann Arbor, Michigan 48109, USA;

<sup>3</sup> Biointerfaces Institute, University of Michigan, Ann Arbor, Michigan 48109, USA;

<sup>4</sup> Department of Materials Science and Engineering, University of Michigan, Ann Arbor, Michigan 48109, USA;

<sup>5</sup> Department of Biomedical Engineering, University of Michigan, Ann Arbor, Michigan 48109, USA;

ϕ These authors contributed equally: Mingqiang Wang, Ahmet Emre.

\*Correspondence: kotov@umich.edu

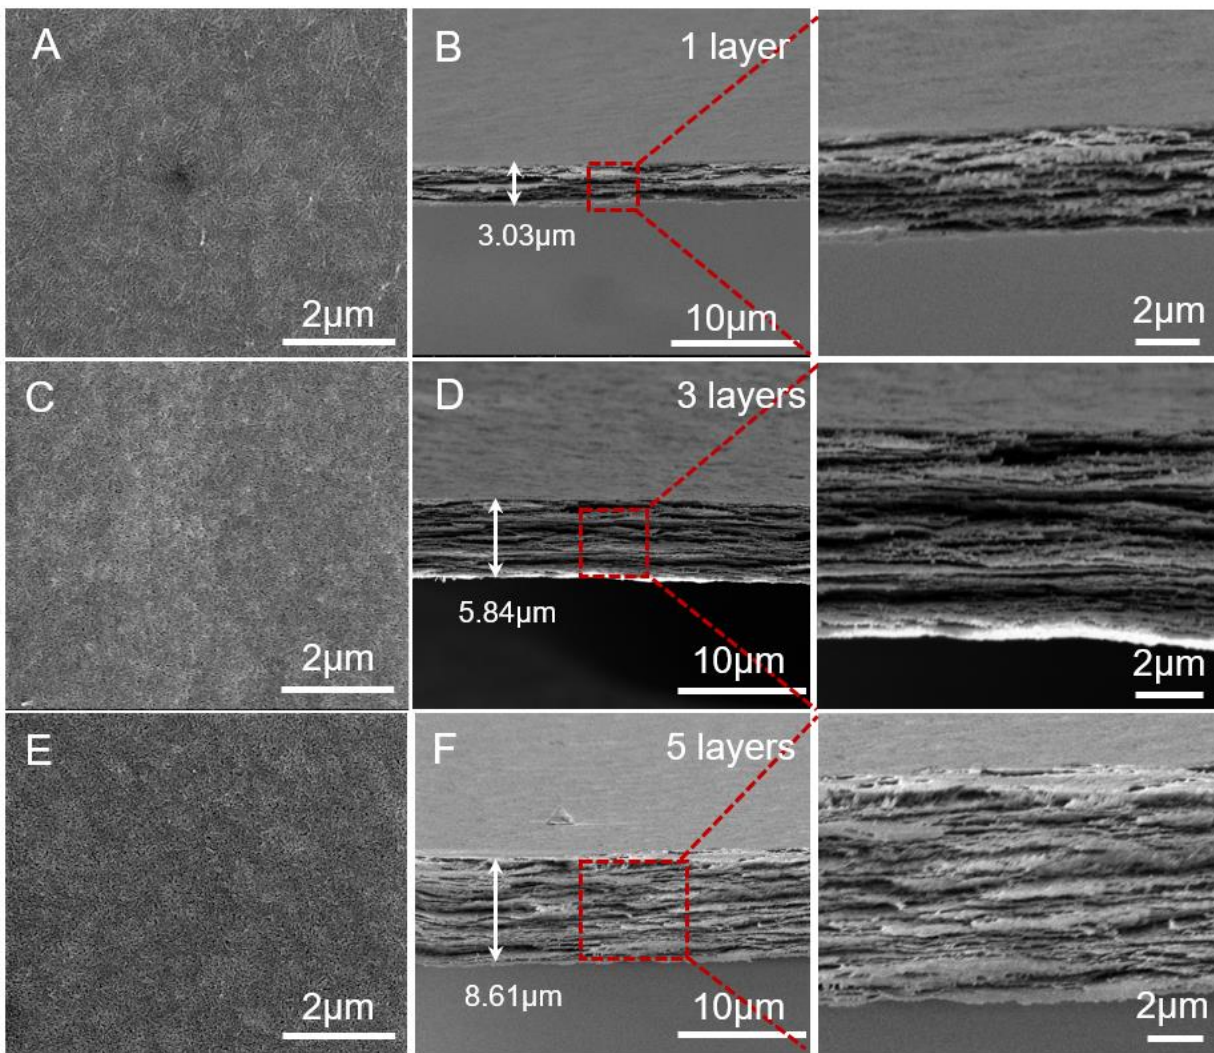

Supplementary Fig 1. (A to F) The SEM images of the surface view and side view of *np-ANF* membrane with different thickness made by sequential deposition of nanofiber strata. (A and B) *np-ANF* membrane with one layer, (C and D), *np-ANF* membrane with three layers, (E and F), *np-ANF* membrane with five layers. SEM images with enlarged sections of the membranes are given in the third column.

While we used LBL assembly to engineer the *np-ANP* composite, the single bilayers (i.e. ANF+PDDA) are thicker than the typical nanometer-scale bilayers from polyelectrolytes observed in LBL-made materials in the past. There is a distinct possibility that ANFs are depositing in the non-linear (exponential) fashion, which can lead to the gradual increase in layer thickness over multiple consecutive cycles due to diffusion-in/diffusion-out mechanism.<sup>1-3</sup>

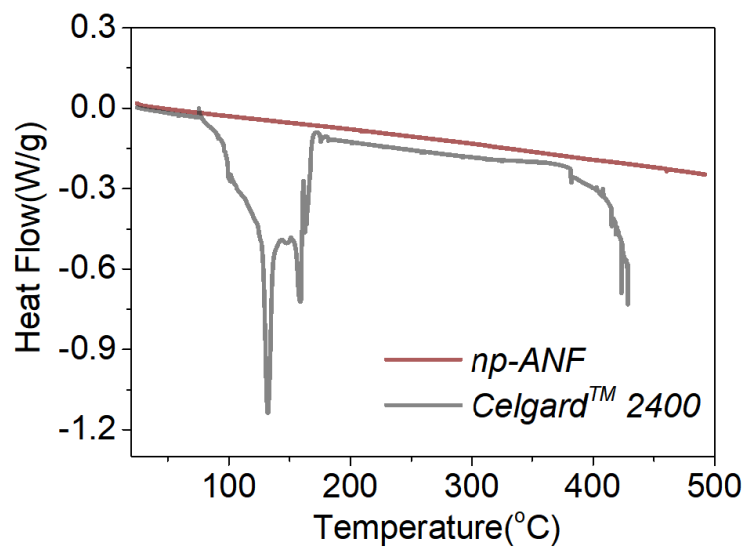

Supplementary Fig 2. DSC curves comparison of *np-ANF* and *Celgard™ 2400* membrane. The *np-ANF* membrane shows excellent thermal stability with no obvious phase change until 500°C. The superior thermal tolerance could effectively prevent internal short-circuit at elevated temperature. In comparison, *Celgard™ 2400* decomposes at 300 °C and exhibits an endothermic peak at 122 °C.

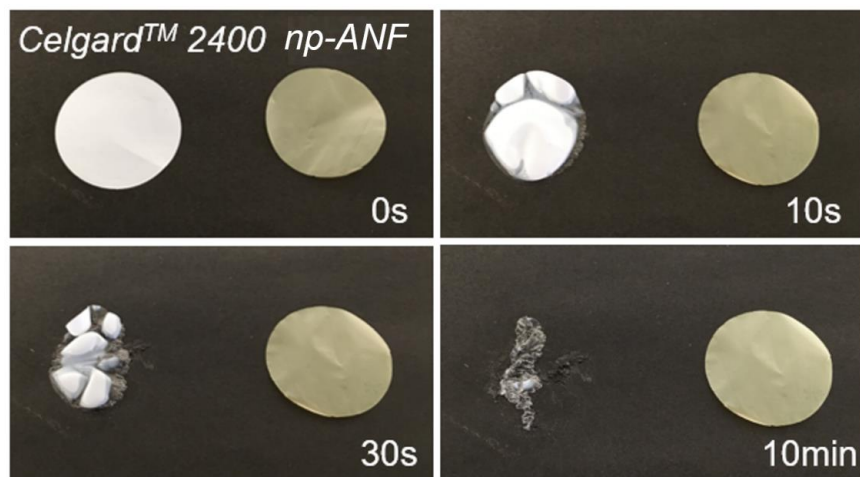

Supplementary Fig 3. Hot solder iron test on *np-ANF* and *Celgard™ 2400* membrane at 150°C with increase time. The time-lapse photography demonstrates a clear difference between two membranes of *np-ANF* and *Celgard™ 2400* on a 150 °C hot plate. The *np-ANF* remained unchanged, showing good thermal stability, while *Celgard™ 2400* membrane shrank strongly.

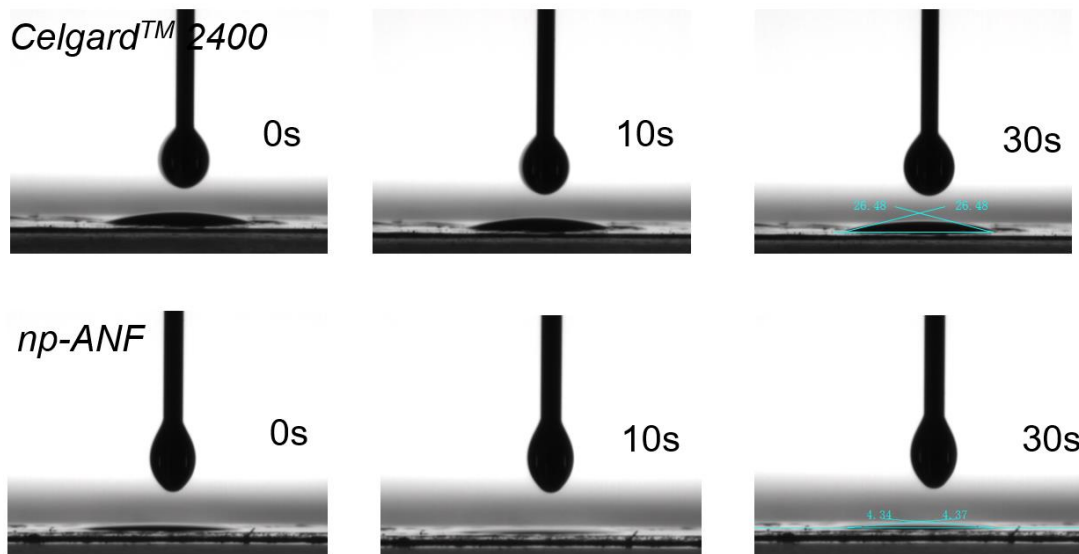

Supplementary Fig 4. Photographs of static liquid electrolyte contact angles of different separators at different rest time. 1 M LiTFSI with 2 wt% LiNO<sub>3</sub> in DOL/DME (v/v=1:1) was used as a liquid electrolyte.

Besides the lower electrolyte contact angle of np-ANF in comparison to *Celgard™ 2400*, the *np-ANF* also has a higher electrolyte uptake.

The electrolyte uptake in this work was evaluated by the weights of sample before ( $W_{dry}$ ) and after ( $W_{wet}$ ) soaking in liquid electrolyte (1 mol/L LiTFSI, DOL /DME (v/v= 1/1) for 2 h and calculated according to equation:

$$\text{Electrolyte uptake} = \frac{W_{wet} - W_{dry}}{W_{dry}} \times 100\%$$

The electrolyte uptake of the pristine *Celgard™ 2400* and the *np-ANF* separator are 158% and 328%, respectively. The greatly improved electrolyte uptake is due to nanofibers were stacked to form a 3D network porous structure as well as the good affinity to lipid groups in the electrolyte<sup>4</sup>.

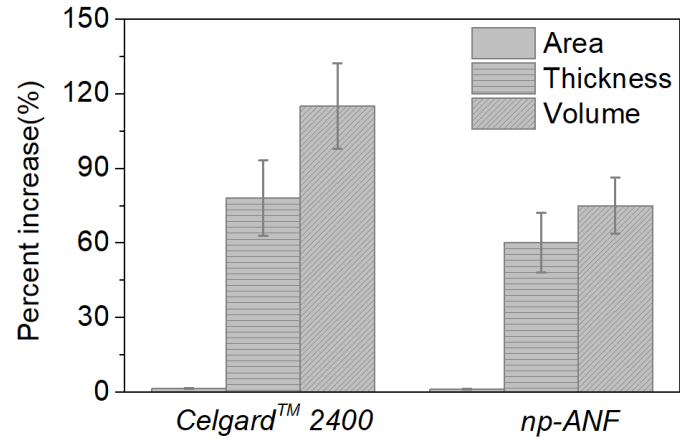

Supplementary Fig 5. Dimensional changes in *Celgard™ 2400* and *np-ANF* when soaked in electrolyte solution

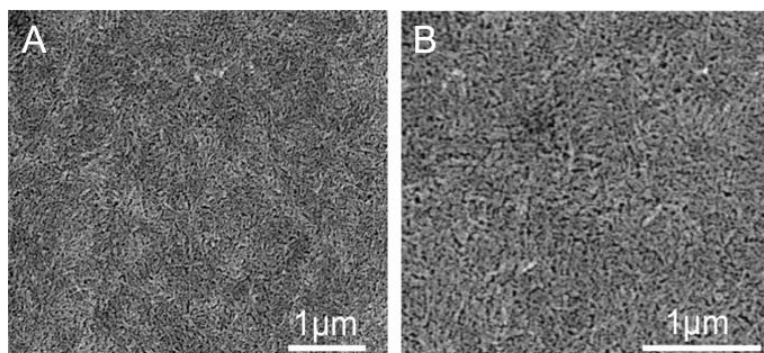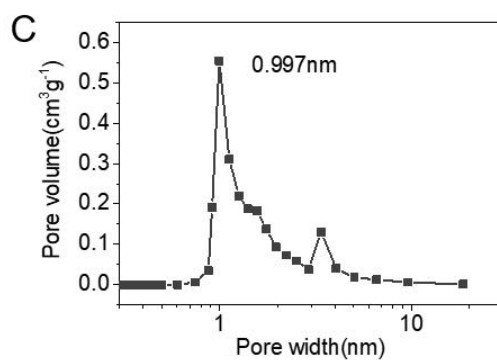

Supplementary Fig 6. (A-B) The magnified SEM images of the surface view *np-ANF* membrane made after three deposition cycles. (C) Pore size width distributions of the *np-ANF* membrane obtained from Barrett-Joyner-Halenda (BJH) analysis.

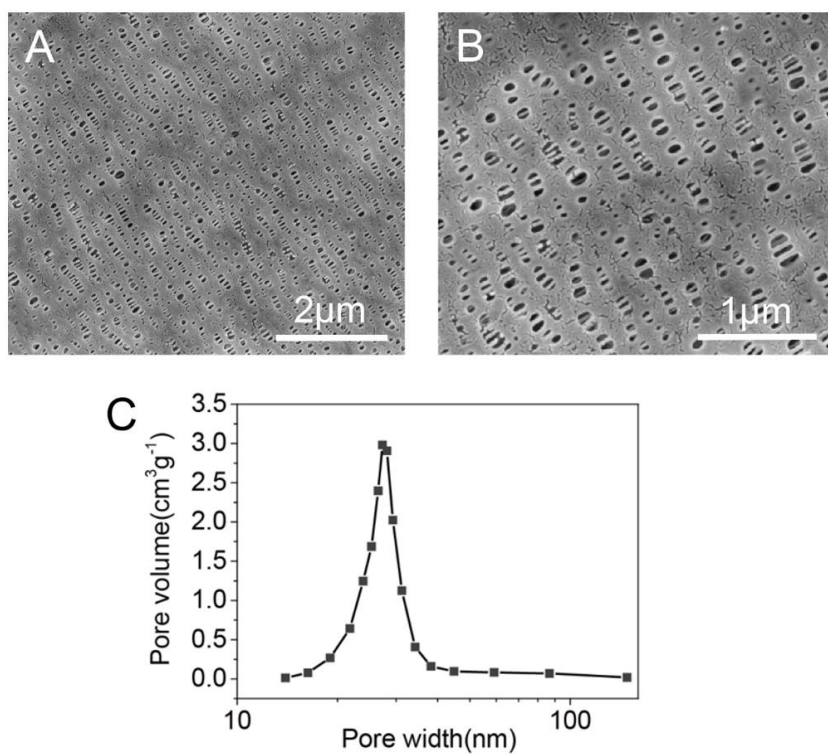

Supplementary Fig 7. (A-B) SEM image of surface of *Celgard*<sup>TM</sup> 2400. (C) The pore size width distributions of the *Celgard*<sup>TM</sup> 2400 obtained from Barrett-Joyner-Halenda (BJH) analysis.



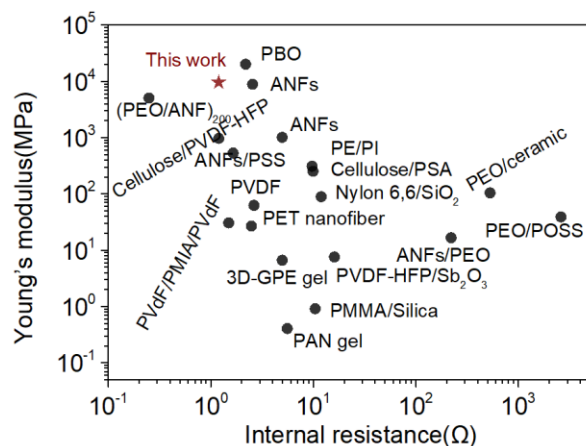

Supplementary Fig 8. Comparative evaluation of Young's modulus and internal resistance normalized to a standard CR2032 coin cell for *np*-ANF and other membranes. The internal resistance of *np*-ANF membrane is obtained by electrochemical impedance spectroscopy (EIS) curve of Li/ *np*-ANF /Li in DOL/DME solution with a standard CR2032 coin as shown in Figure S9. The corresponding references and the list of abbreviations are given in Table S2.

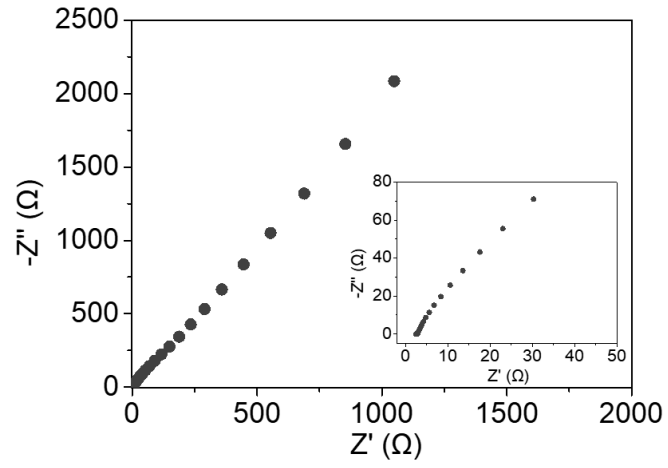

Supplementary Fig 9. The impedance spectra of Li/ *np*-ANF /Li using standard CR2032 coin cell.

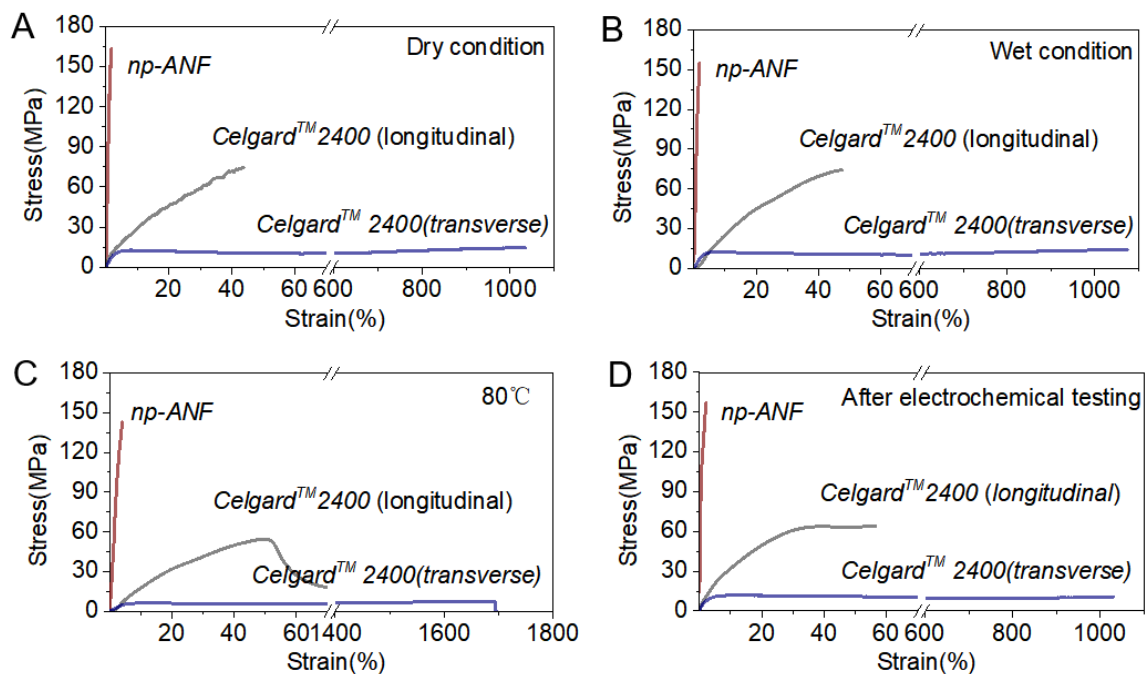

Supplementary Fig 10. Stress-strain curves for *np-ANF* and *Celgard™ 2400* in different state (A) dry (B) wet; (C) 80°C; (D) after electrochemical testing.

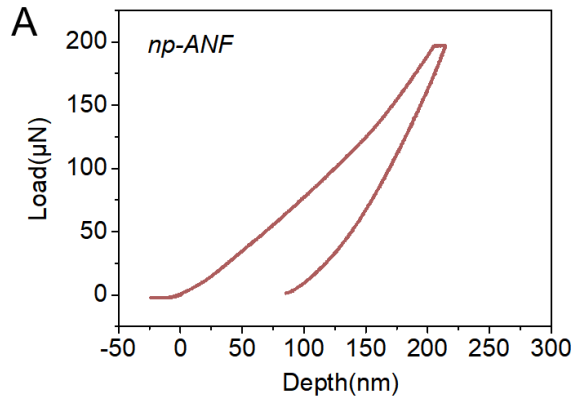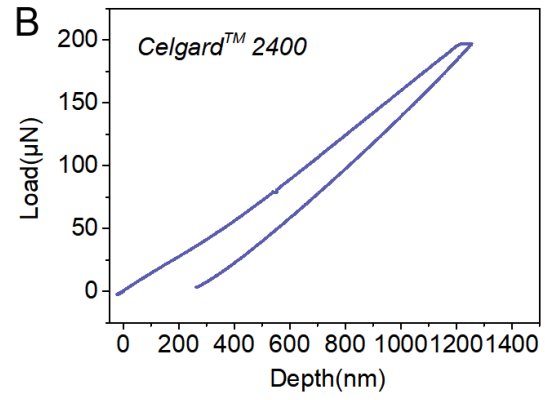

Supplementary Fig 11. Nano-indentation comparison for (A) *np-ANF* and (B) *Celgard™ 2400*

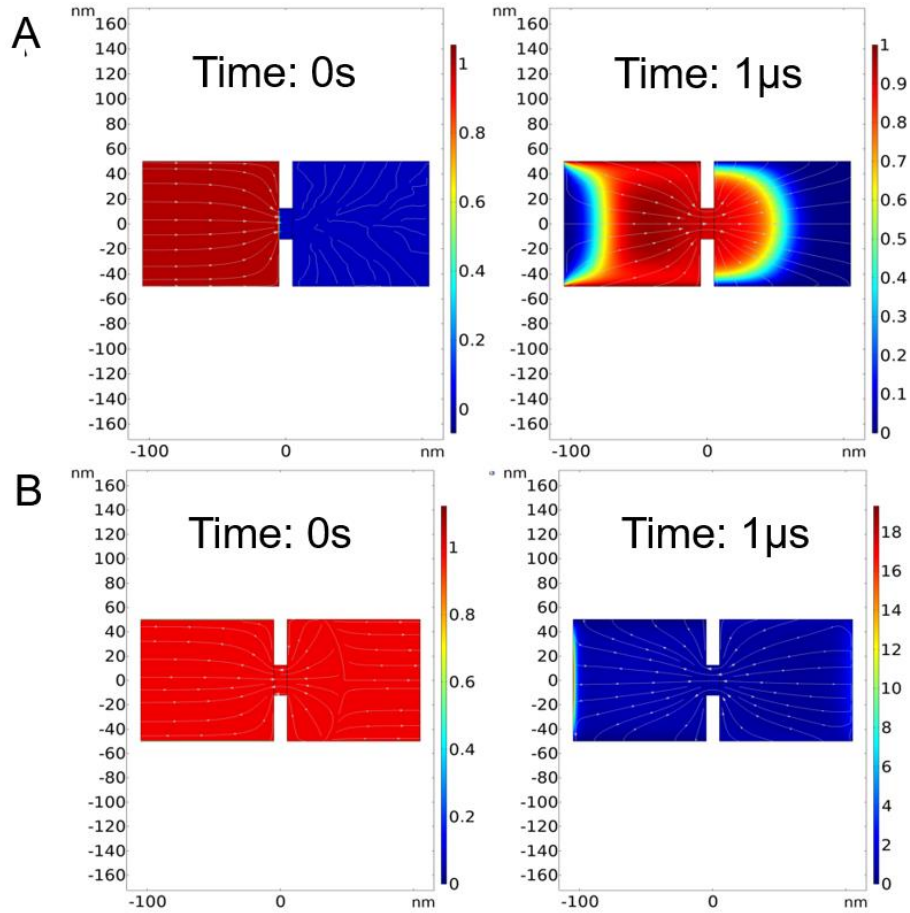

Supplementary Fig 12. Theoretical simulation of ionic flow in *Celgard<sup>TM</sup>* separator pores by finite element analysis (COMSOL Multiphysics). The concentration map and streamline change of LPS (A) and Li ion (B) from  $t = 0$  to  $t = 1 \mu\text{s}$ .

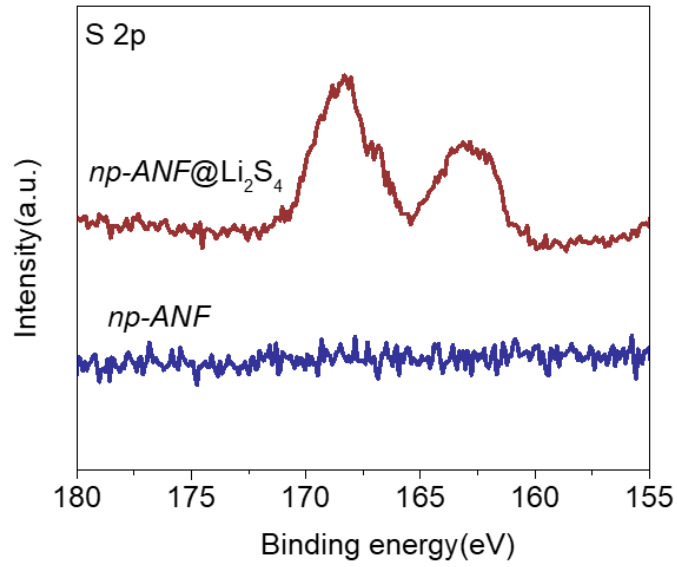

Supplementary Fig 13. the High-resolution XPS spectra of S<sub>2p</sub> comparison of *np-ANF* before and after adsorption test Li<sub>2</sub>S<sub>4</sub> solution followed by rinsing with DOL/DME solution and drying in glovebox

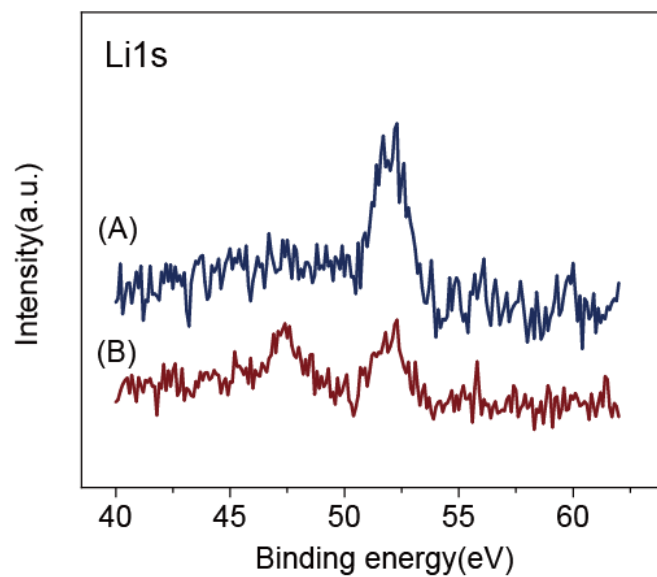

Supplementary Fig 14. High-resolution XPS spectra of retrieved *np-ANF* sample (A) from  $\text{LiNO}_3$  solution (B) from  $\text{Li}_2\text{S}_4$  solution.

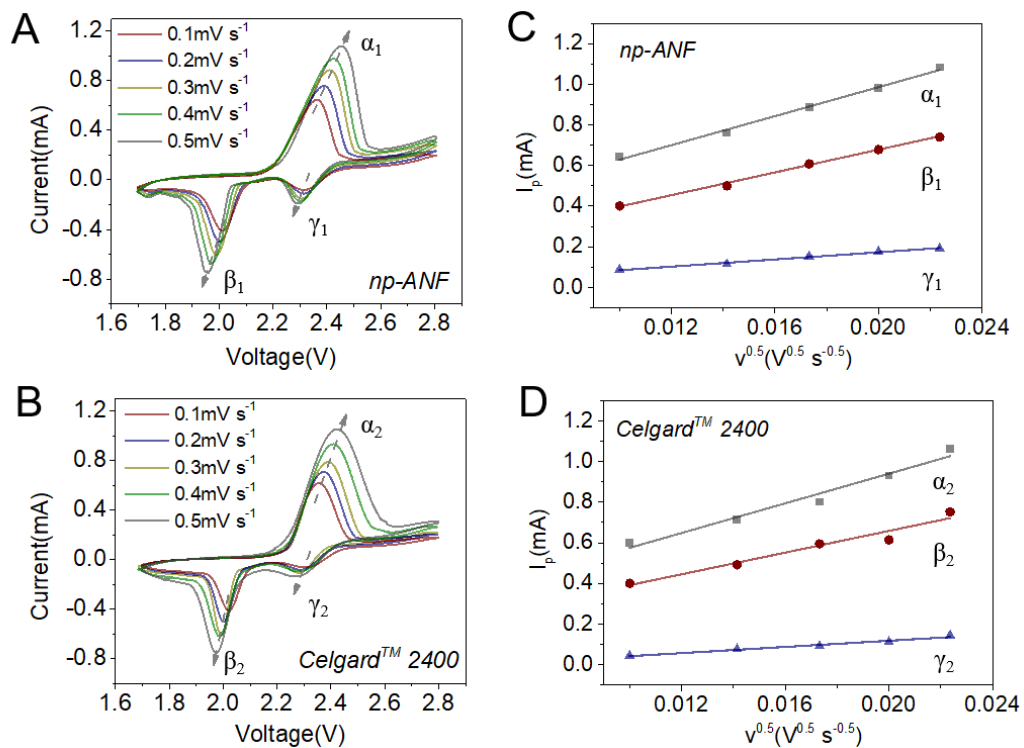

Supplementary Fig 15. Cyclic voltammograms at different voltage scan rates of Li-S cells: (A) with *np-ANF* membrane and (B) with *Celgard™ 2400* membrane; (C-D) the linear fits of the peak currents for cells with *np-ANF* (C) and *Celgard™ 2400* (D) membranes.



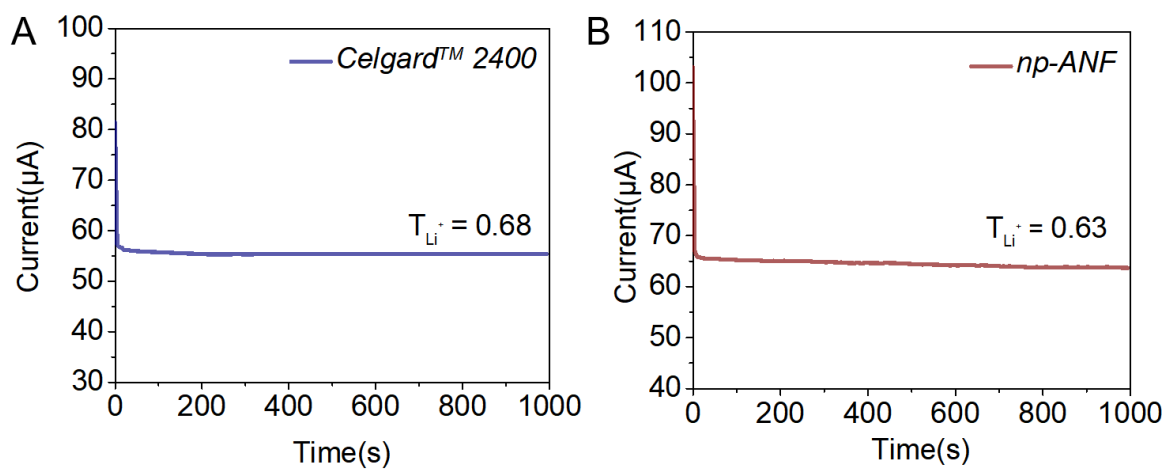

Supplementary Fig 16. Lithium ions transference number for (A) Celgard<sup>TM</sup> 2400; (B) np-ANF

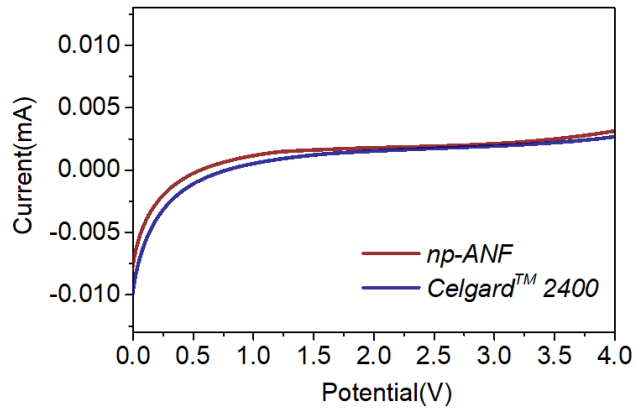

Supplementary Fig 17. Linear sweep voltammetry for *Celgard™ 2400*, and *np-ANF* separators. The cell configuration was a two electrode cell consisting of Li metal working electrode and a stainless-steel counter electrode with a scan rate of  $0.1 \text{ mV s}^{-1}$ .

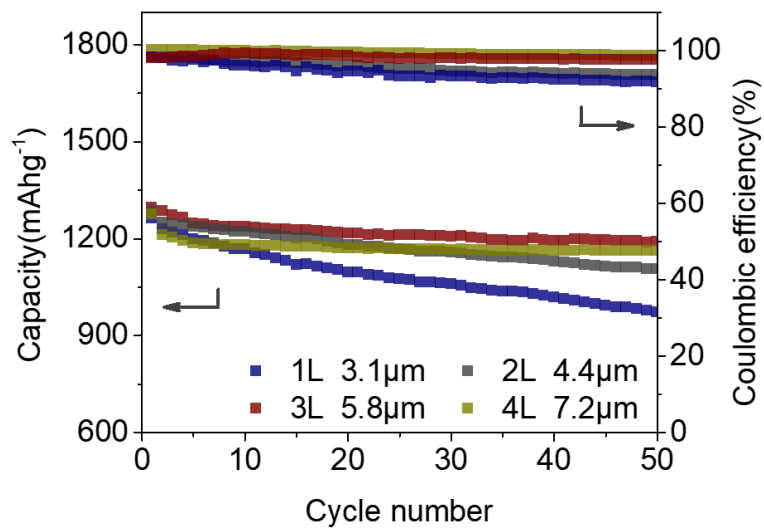

Supplementary Fig 18. Cycling performance of Li-S batteries with *np*-ANF membranes with from one layer to four layers at 0.1C rate.

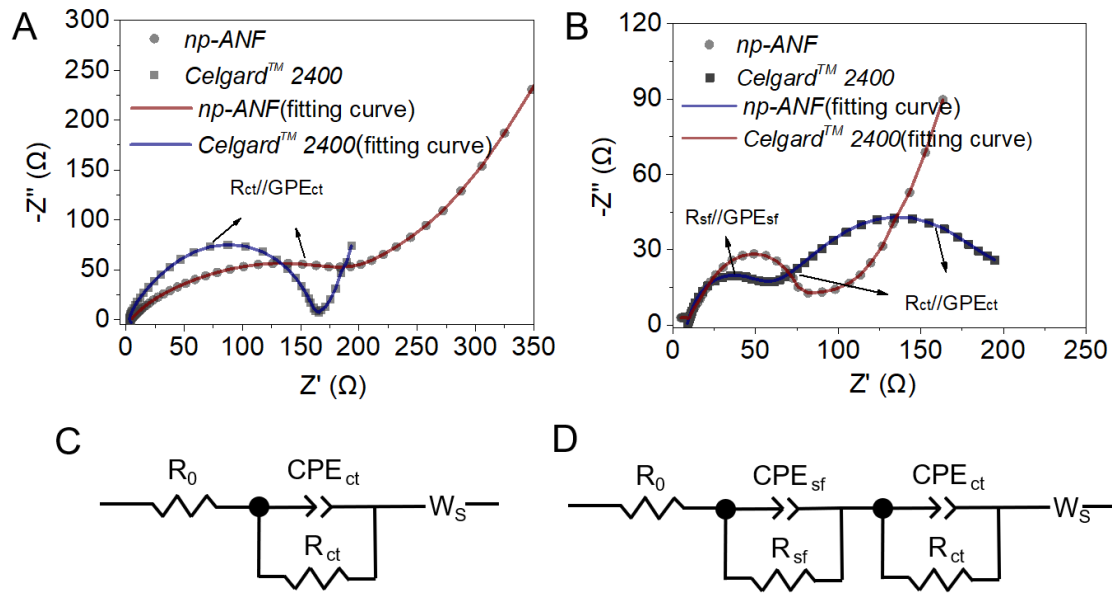

Supplementary Fig 19. Electrochemical impedance spectra of Li–S batteries (**A**) before and (**B**) after cycling using *Celgard<sup>TM</sup> 2400* and *np-ANF* membranes, and corresponding equivalent circuits before (**C**) and after (**D**) cycling; notations:  $R_0$  is interphase-contact resistance of the electrolyte and battery;  $R_{ct}$  is the charge transfer resistance;  $R_{sf}$  is the surface film resistances;  $W_s$  is the Warburg impedance, CPE is a constant-phase element (CPE) attributed describing the double layer capacitance<sup>5,6</sup>

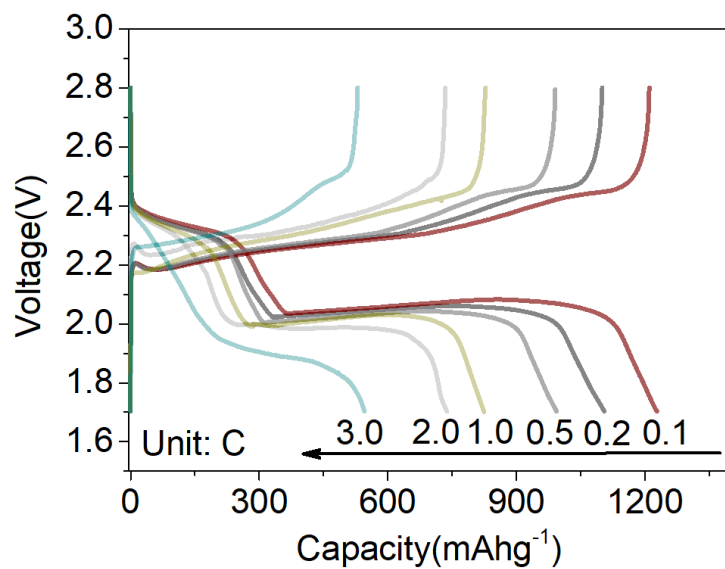

Supplementary Fig 20. Rate performance of Li-S cell with *np-ANF* membrane at a sulfur loading of 1.2mg/cm<sup>2</sup>.

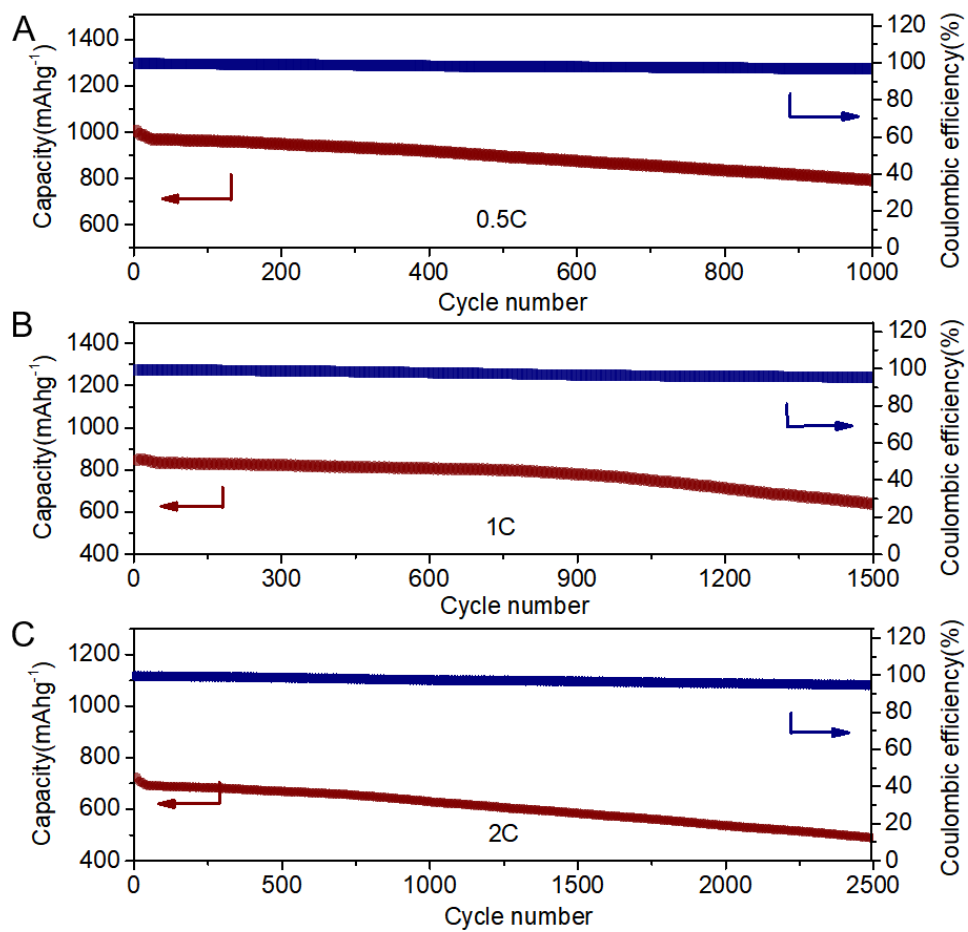

Supplementary Fig 21. Cycling performance Li-S batteries with *np*-ANF membrane (A) at a rate of 0.5 C over 1000 cycles; (B) at a rate of 1C over 1500 cycles; (C) at a rate of 2C over 2500 cycles at a sulfur loading of 1.2mg/cm<sup>-2</sup>

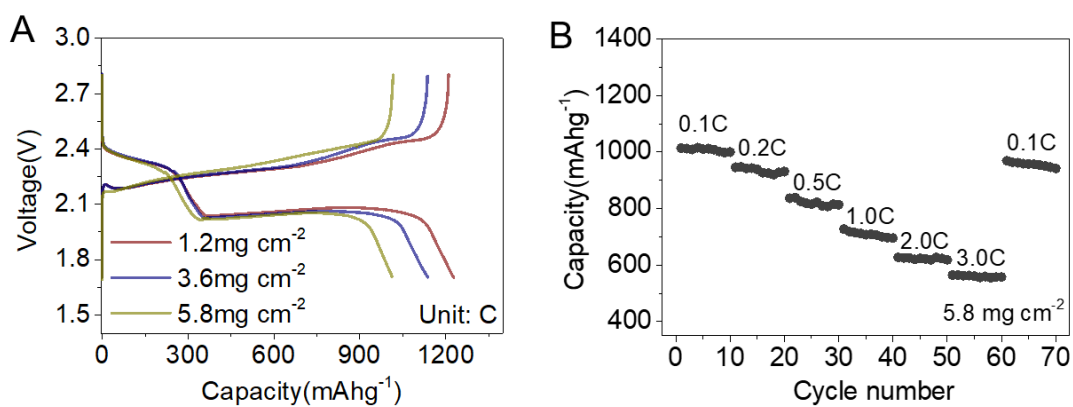

Supplementary Fig 22. Electrochemical performance of the Li-S batteries with *np*-ANF with various sulfur loadings. (A) Charge and discharge curve of Li-S batteries with *np*-ANF membrane at various sulfur loadings. (B). Rate performance of Li-S batteries ranged 0.1C to 3C with *np*-ANF at a sulfur loading of 5.8 mg cm<sup>-2</sup>.

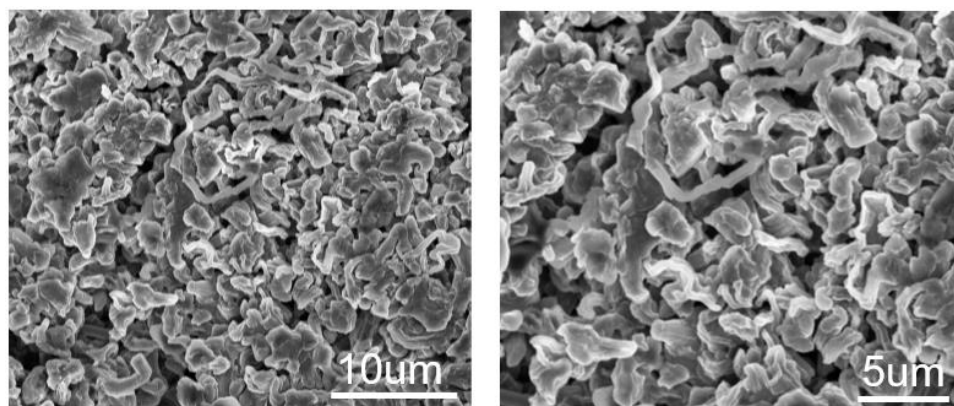

Supplementary Fig 23 . SEM images of the lithium electrode with *Celgard<sup>TM</sup> 2400* membrane after 250 hours cycles of stripping/plating in 1mol/L  $\text{LiCF}_3\text{SO}_3$  DOL: DME v/v = 1/1) at a current density of  $2\text{mAcm}^{-2}$ .



Supplementary Table 1: Tensile strength, Young's modulus, Tensile toughness and elongation at break of *np-ANF* and *Celgard™ 2400* membrane

| Condition                         | Sample                        | Thickness (μm) | Tensile strength (MPa) | Young's modulus (GPa)                         | Tensile toughness (J/m <sup>3</sup> )      | Elongation at break (%) |
|-----------------------------------|-------------------------------|----------------|------------------------|-----------------------------------------------|--------------------------------------------|-------------------------|
| <i>np-ANF</i>                     | Dry                           | 5.8±0.5        | 167.4±8.4              | 9.2±0.5                                       | 3.0*10 <sup>3</sup> ±76                    | 1.82±0.09               |
|                                   | Wet                           | 5.8±0.5        | 154.5±7.7              | 8.1±0.4                                       | 3.0*10 <sup>3</sup> ±80                    | 1.91±0.1                |
|                                   | 80 °C                         | 5.8±0.5        | 142.3±7.1              | 3.5±0.2                                       | 5.9*10 <sup>3</sup> ±150                   | 4.12±0.2                |
|                                   | After electrochemical testing | 5.8±0.5        | 155.1±7.8              | 7.2±0.4                                       | 3.3*10 <sup>3</sup> ±75                    | 2.15±0.2                |
| <i>Celgard™ 2400 longitudinal</i> | Dry                           | 25±1.3         | 74.5±3.7               | 0.17±0.02                                     | 3.22*10 <sup>4</sup> ±181                  | 43.8±2.2                |
|                                   | Wet                           | 25±1.3         | 73.8±3.7               | 0.15±0.03                                     | 3.68*10 <sup>4</sup> ±183                  | 49.8±2.5                |
|                                   | 80 °C                         | 25±1.3         | 54.4±2.7               | 0.05±0.003                                    | 6.1*10 <sup>4</sup> ±260                   | 113±5.7                 |
|                                   | After electrochemical testing | 25±1.3         | 63.7±3.2               | 0.11±0.07                                     | 3.6*10 <sup>4</sup> ±220                   | 56.5±6.8                |
| <i>Celgard™ 2400 transverse</i>   | Dry                           | 25±1.3         | 14.3±0.7               | 1.28*10 <sup>-3</sup> ± 0.07*10 <sup>-3</sup> | 1.47*10 <sup>5</sup> ±0.07*10 <sup>5</sup> | 1033±50                 |
|                                   | Wet                           | 25±1.3         | 13.7±0.7               | 1.27*10 <sup>-3</sup> ± 0.06*10 <sup>-3</sup> | 1.47*10 <sup>5</sup> ±0.07*10 <sup>5</sup> | 1074±54                 |
|                                   | 80 °C                         | 25±1.3         | 6.8±0.34               | 0.4*10 <sup>-3</sup> ± 0.02*10 <sup>-3</sup>  | 1.15*10 <sup>5</sup> ±0.05*10 <sup>5</sup> | 1690±84                 |
|                                   | After electrochemical testing | 25±1.3         | 10.3±1.5               | 0.95*10 <sup>-3</sup> ± 0.08*10 <sup>-3</sup> | 1.12*10 <sup>5</sup> ±0.11*10 <sup>5</sup> | 1085±100                |

Supplementary Table 2. Young's moduli and internal resistances data for different materials for batteries.

| Membrane                                | Description                                                                                                                        | Young's modulus (MPa) | Internal resistances | REF |
|-----------------------------------------|------------------------------------------------------------------------------------------------------------------------------------|-----------------------|----------------------|-----|
| <i>np-ANF</i>                           | <b>This work</b>                                                                                                                   | $9.2 \times 10^3$     | 1.2                  |     |
| ANFs                                    | Aramid nanofibers membrane prepared by vacuum filtration                                                                           | $8.8 \times 10^3$     | 2.57                 | 7   |
| ANFs                                    | Aramid nanofibers(20-50nm) membrane                                                                                                | $1 \times 10^3$       | ~5                   | 8   |
| (PEO/ANF) <sub>200</sub>                | It stands for (PEO/Aramid nanofibers) <sub>200</sub> composite membrane                                                            | $5 \times 10^3$       | 0.25                 | 9   |
| ANFs/PEO                                | It stands 15% Aramid nanofibers / Poly(ethylene oxide) composite membrane                                                          | 16.5                  | 223                  | 10  |
| ANFs/PSS                                | It stands 15% Aramid nanofibers polyphenylene sulfide composite membrane                                                           | 528                   | 1.66                 | 11  |
| PBO                                     | PBO stands for Poly-p-Phenylene Benzobisoxazole memberane                                                                          | $2 \times 10^4$       | 2.2                  | 12  |
| Cellulose/PVDF-HFP                      | It stands for Cellulose/ Poly(vinylidene fluoride-hexafluoropropylene composite nonwoven                                           | 960                   | 1.2                  | 13  |
| Cellulose/PSA                           | It stands for Cellulose/Polysulfonamide composite membrane                                                                         | 250                   | 10                   | 14  |
| PE/PI                                   | It stands for Polyethylene co-polyimide copolymer composite membrane                                                               | 308                   | 9.8                  | 15  |
| PVdF/PMIA/PVdF                          | PVdF/PMIA/PVdF stands for PVdF/ Poly(m-phenylene isophthalamide) /PVdF nanofiber composite membrane                                | 30.3                  | 1.5                  | 16  |
| PVDF-HFP/Sb <sub>2</sub> O <sub>3</sub> | It stands for PVDF-HFP/Sb <sub>2</sub> O <sub>3</sub> composite membrane                                                           | 7.52                  | 16.13                | 17  |
| PVDF                                    | It stands for PVDF porous membrane                                                                                                 | 62.08                 | 2.65                 | 18  |
| PEO/ceramic                             | It stands for Poly(ethylene oxide)/ceramic composite membrane                                                                      | 103                   | 2631                 | 19  |
| PEO/POSS                                | It stands for PEO/polyhedral oligomeric silsesquioxane composite membrane                                                          | 38.5                  | 535                  | 20  |
| PMMA/Silica                             | It stands for Poly(methylmethacrylate) /Silica composite membrane                                                                  | 0.9                   | 10.5                 | 21  |
| PAN gel                                 | It stands for Polyacrylonitrile gel membrane                                                                                       | 0.4                   | 5.6                  | 22  |
| 3D-GPE                                  | It stands for Diglycidyl ether of bisphenol-A, Poly(ethylene glycol) diglycidyl ether, Diamino-poly(propylene oxide) composite gel | 6.56                  | 5                    | 23  |
| PET                                     | It stands Polyethyleneterephthalate nanofiber membrane                                                                             | 26.6                  | 2.5                  | 24  |

|                            |                                                         |    |    |    |
|----------------------------|---------------------------------------------------------|----|----|----|
| Nylon 6,6/SiO <sub>2</sub> | It stands Nylon 6,6/SiO <sub>2</sub> composite membrane | 88 | 12 | 25 |
|----------------------------|---------------------------------------------------------|----|----|----|

Supplementary Table 3. Ion-transport parameters for *np-ANF* membranes and *Celgard™ 2400*

| Parameters                                                                  | <i>np-ANF</i>          | <i>Celgard™ 2400</i>   |
|-----------------------------------------------------------------------------|------------------------|------------------------|
| <b>Li<sup>+</sup></b> transfer number                                       | 0.63                   | 0.68                   |
| <b>D<sub>Li+</sub></b> (cm <sup>2</sup> s <sup>-1</sup> ) A (anodic peak)   | 9.263•10 <sup>-8</sup> | 9.693•10 <sup>-8</sup> |
| <b>D<sub>Li+</sub></b> (cm <sup>2</sup> s <sup>-1</sup> ) B (cathodic peak) | 5.310•10 <sup>-8</sup> | 5.129•10 <sup>-8</sup> |
| <b>D<sub>Li+</sub></b> (cm <sup>2</sup> s <sup>-1</sup> ) C (cathodic peak) | 0.421•10 <sup>-8</sup> | 0.567•10 <sup>-8</sup> |

Supplementary Table 4. Fitting results of EIS plots in Figure S18.

| Parameters                                  | <i>np-ANF</i>         |                         | <i>Celgard™ 2400</i>  |                         |
|---------------------------------------------|-----------------------|-------------------------|-----------------------|-------------------------|
|                                             | <i>Before cycling</i> | <i>After 100 cycles</i> | <i>Before cycling</i> | <i>After 100 cycles</i> |
| <b>R<sub>0</sub></b> (Ω)                    | 1.2                   | 7.2                     | 3.9                   | 11.2                    |
| <b>R<sub>ct</sub>//CPE<sub>ct</sub></b> (Ω) | 255.4                 | 93.6                    | 166.1                 | 162.8                   |
| <b>R<sub>sf</sub>//CPE<sub>sf</sub></b> (Ω) | --                    | --                      | --                    | 56                      |

Supplementary Table 5. The summary of comparative performance for Li-S batteries with different structural designs of membranes.

| Functional Membrane coating on to PP/PE    | Electrochemical Performance                      |                        |                            |                                                |                 | REF |
|--------------------------------------------|--------------------------------------------------|------------------------|----------------------------|------------------------------------------------|-----------------|-----|
|                                            | Initial discharge capacity (mAhg <sup>-1</sup> ) | Capacity retention (%) | Capacity fade per cycle(%) | Current density(1C = 1675 mA g <sup>-1</sup> ) | Number of cycle |     |
| <i>np-ANF</i>                              | 1268±38                                          | 85±2.6%                | 0.092%                     | 0.1C                                           | 300             |     |
| <i>np-ANF</i>                              | 969±28                                           | 79.2±2.4%              | 0.02%                      | 0.5C                                           | 1000            |     |
| <i>np-ANF</i>                              | 889±26                                           | 76.0±2.3%              | 0.016%                     | 1.0C                                           | 1500            |     |
| <i>np-ANF</i>                              | 703±20                                           | 69.6±2.1%              | 0.012%                     | 2.0C                                           | 2500            |     |
| <i>np-ANF</i>                              | 521±16                                           | 64.7±1.9%              | 0.01%                      | 3.0C                                           | 3500            |     |
| Graphene oxide                             | 1170                                             | 32%                    | 0.93%                      | 1.0C                                           | 400             | 26  |
| Graphene oxide                             | 920                                              | 77%                    | 0.23%                      | 0.1C                                           | 100             | 27  |
| Graphene                                   | 1052                                             | 70%                    | 0.1%                       | 0.91C                                          | 300             | 28  |
| SWCNT                                      | 1132                                             | 44.2%                  | 0.19%                      | 0.2C                                           | 300             | 29  |
| MWCNT                                      | 1073                                             | 47%                    | 0.14%                      | 1.0C                                           | 300             | 30  |
| MWCNT/PEG                                  | 1206                                             | 52%                    | 0.16%                      | 0.2C                                           | 300             | 31  |
| Microporous carbon/PEG                     | 1307                                             | 45%                    | 0.11%                      | 0.2C                                           | 500             | 32  |
| Carbon nanofiber                           | 1270                                             | 74%                    | 0.13%                      | 0.5C                                           | 200             | 33  |
| Carbon                                     | 1386                                             | 60%                    | 0.20%                      | 0.2C                                           | 200             | 34  |
| Carbon paper                               | 1176                                             | 85%                    | 0.15%                      | 1.0C                                           | 100             | 35  |
| Carbon black                               | 1350                                             | 55%                    | 0.09%                      | 0.2C                                           | 500             | 36  |
| N-porous carbon/PP                         | 882                                              | 88%                    | 0.024%                     | 1.0C                                           | 500             | 37  |
| N-doped-carbon nanowire                    | 1123                                             | 60%                    | 0.08%                      | 0.2C                                           | 500             | 38  |
| Cobalt/nitrogen co-doped carbon nanofibers | 865                                              | 71.2%                  | 0.06%                      | 0.2C                                           | 500             | 39  |
| C <sub>3</sub> N <sub>4</sub>              | 1100                                             | 66%                    | 0.07%                      | 1.0C                                           | 500             | 40  |
| TiO <sub>2</sub> /graphene                 | 700                                              | 80%                    | 0.01%                      | 2.0C                                           | 1000            | 41  |
| TiO <sub>2</sub> /CNTs                     | 627                                              | 57.5%                  | 0.17%                      | 0.5C                                           | 250             | 42  |
| TiO <sub>2</sub> /C <sub>65</sub>          | 1206                                             | 50.3%                  | 0.1%                       | 0.5C                                           | 500             | 43  |

|                                                           |        |       |         |         |      |    |
|-----------------------------------------------------------|--------|-------|---------|---------|------|----|
| TiO <sub>2</sub> /TiN                                     | 927    | 67%   | 0.017%  | 1.0C    | 2000 | 44 |
| TiN                                                       | 880    | 63.6% | 0.091%  | 1.0C    | 400  | 45 |
| NbN                                                       | 815    | 75.8% | 0.061%  | 1.0C    | 300  | 46 |
| V <sub>2</sub> O <sub>5</sub>                             | 880    | 91.2% | 0.035%  | 0.0667C | 250  | 47 |
| V <sub>2</sub> O <sub>5</sub> /carbon nanofiber           | 1400   | 28.5% | 0.07%   | 3.0C    | 1000 | 48 |
| Al <sub>2</sub> O <sub>3</sub>                            | 967    | 61.5% | 0.77%   | 0.2C    | 50   | 49 |
| Al <sub>2</sub> O <sub>3</sub> /graphene                  | 1067.7 | 75%   | 0.25%   | 0.2C    | 100  | 50 |
| Al <sub>2</sub> O <sub>3</sub> /CNT                       | 1287   | 63%   | 0.37%   | 0.2C    | 100  | 51 |
| Li@Nafion/PEP/Al <sub>2</sub> O <sub>3</sub>              | 924    | 77.2% | 0.022%  | 1.0C    | 1000 | 52 |
| SnO <sub>2</sub>                                          | 622    | 68%   | 0.064%  | 0.2C    | 500  | 53 |
| Co <sub>9</sub> S <sub>8</sub>                            | 986    | 83.1% | 0.011%  | 1.0C    | 1500 | 54 |
| Li <sub>4</sub> Ti <sub>5</sub> O <sub>12</sub> /graphene | 813.3  | 85.7% | 0.03%   | 1.0C    | 500  | 55 |
| PEDOT:PSS                                                 | 748    | 64.3% | 0.0714% | 1.0C    | 500  | 56 |
| MoS <sub>2</sub>                                          | 808    | 50%   | 0.083%  | 0.5C    | 600  | 6  |
| MoS <sub>2</sub> /CNTs                                    | 1237   | 52.4% | 0.061   | 0.5C    | 500  | 57 |
| MOF/CNTs                                                  | 1101   | 50%   | 0.165%  | 0.25C   | 300  | 58 |
| MOF/GO                                                    | 612    | 71%   | 0.019%  | 1.0C    | 1500 | 59 |
| MOF/SiO <sub>2</sub>                                      | 1400   | 42.9% | 0.57%   | 0.1C    | 100  | 60 |
| Ce-MOFs/CNT/PP                                            | 1021   | 82%   | 0.022%  | 1.0C    | 800  | 61 |
| Ni <sub>3</sub> (HITP) <sub>2</sub> /PP                   | 851    | 84.1% | 0.032%  | 1.0C    | 500  | 62 |
| Ti <sub>3</sub> C <sub>2</sub> /CNTs                      | 1240   | 51.6% | 0.043%  | 0.5C    | 1200 | 63 |
| MnO <sub>2</sub> /graphene/CNTs                           | 829    | 27.5% | 0.029%  | 1.0C    | 2500 | 64 |
| NiFe/N-doped graphene                                     | 812    | 40%   | 0.06%   | 2.0C    | 1000 | 65 |
| Glass fiber                                               | 630    | 80%   | 0.04%   | 0.5C    | 500  | 66 |
| Red phosphorus/PP                                         | 889    | 82%   | 0.036%  | 1.0C    | 500  | 67 |
| Nafion                                                    | 781    | 60%   | 0.08%   | 1.0C    | 500  | 68 |
| Nafion/GO                                                 | 1057   | 46%   | 0.18%   | 1.0C    | 300  | 69 |
| PMIA                                                      | 773.6  | 73%   | 0.045%  | 1.0C    | 600  | 70 |
| PMIA                                                      | 1121.5 | 63.5% | 0.06%   | 0.5C    | 600  | 71 |
| PD/PI                                                     | 1404   | 63.4% | 0.366%  | 0.5C    | 100  | 72 |
| PAA                                                       | 600    | 56%   | 0.074%  | 0.5C    | 600  | 73 |
| PAH/PAA                                                   | 1418   | 30%   | 1.4%    | --      | 50   | 74 |

|                                                                  |      |     |        |       |      |    |
|------------------------------------------------------------------|------|-----|--------|-------|------|----|
| PAN/PMMA                                                         | 1000 | 65% | 0.175% | 2.0C  | 200  | 75 |
| PZI                                                              | 940  | 88% | 0.012% | 1.0C  | 1000 | 76 |
| Zn <sub>2</sub> (benzimidazolate) <sub>2</sub> (OH) <sub>2</sub> | 1272 | 58% | 0.2%   | 0.25C | 200  | 77 |

Supplementary Table 6. Comparison of electrochemical performance of the *np*-ANF membranes with that of recent publications in Li-S batteries with various separators in the case of high sulfur loadings more than 3 mg cm<sup>-2</sup>

| Separator Membrane                              | Cathode    | Sulfur loading (mg cm <sup>-2</sup> ) | Electrochemical Performance                      |                                               |                             |                                                 |                 | REF |
|-------------------------------------------------|------------|---------------------------------------|--------------------------------------------------|-----------------------------------------------|-----------------------------|-------------------------------------------------|-----------------|-----|
|                                                 |            |                                       | Initial discharge capacity (mAhg <sup>-1</sup> ) | Initial areal capacity (mAhcm <sup>-2</sup> ) | Capacity fade per cycle (%) | Current density (1C = 1675 mA g <sup>-1</sup> ) | Number of cycle |     |
| <i>np</i> -ANF                                  | C/S        | 5.8                                   | 1018±30                                          | 5.9±0.18                                      | 0.085±0.003%                | 0.1 C                                           | 200             |     |
| <i>np</i> -ANF                                  | C/S        | 5.8                                   | 945±28                                           | 5.5±0.16                                      | 0.066±0.002%                | 0.2 C                                           | 500             |     |
| MoS <sub>2</sub> -Polymer/Celgard               | C/S        | 4.0                                   | ~800                                             | ~3.2                                          | 0.2%                        | 1.0 C                                           | 400             | 78  |
| Co <sub>9</sub> S <sub>8</sub> /Celgard         | C/S        | 5.6                                   | 985                                              | 5.5                                           | 0.079%                      | 0.1C                                            | 200             | 79  |
| V <sub>2</sub> O <sub>5</sub> /graphene/Celgard | C/S        | 5.5                                   | ~780                                             | 4.3                                           | ~0.102%                     | 0.1C                                            | 100             | 80  |
| Red phosphorus/PP                               | C/S        | 5.0                                   | 620                                              | 3.1                                           | 0.194%                      | 0.3C                                            | 100             | 67  |
| Co/NCNS/CNT/Celgard                             | C/S        | 5.0                                   | 1134                                             | 5.67                                          | 0.108%                      | 1.0 C                                           | 500             | 81  |
| C <sub>3</sub> N <sub>4</sub> /Celgard          | C/S        | 5.0                                   | 1134                                             | 5.11                                          | 0.51%                       | 0.1C                                            | 40              | 82  |
| NbN/PP                                          | C/S        | 4.0                                   | 815                                              | 3.3                                           | 0.08%                       | 1.0C                                            | 300             | 46  |
| MOF/PAN                                         | rGO/S      | 7.7                                   | 1102                                             | 8.5                                           | 0.17%                       | 0.2C                                            | 50              | 83  |
| Li@Nafion/PEP/Al <sub>2</sub> O <sub>3</sub>    | rGO/S      | 7.6                                   | 1087                                             | 8.26                                          | 0.114%                      | 0.2C                                            | 300             | 52  |
| TiO <sub>2</sub> /TiN/Celgard                   | Graphene/S | 4.3                                   | 493                                              | 2.1                                           | 0.033%                      | 1.0C                                            | 2000            | 44  |
| N-porous carbon/PP                              | CNT/S      | 6.0                                   | 977                                              | 5.8                                           | 0.047%                      | 0.5C                                            | 400             | 37  |

|                                         |                    |     |       |      |        |      |     |    |
|-----------------------------------------|--------------------|-----|-------|------|--------|------|-----|----|
| Cellulose nanofiber paper               | CNT/S              | 3.0 | ~830  | ~2.5 | 0.05%  | 0.1C | 200 | 84 |
| Ni <sub>3</sub> (HITP) <sub>2</sub> /PP | CNT/S              | 8.0 | 1055  | 8.4  | 0.071% | 0.5C | 200 | 62 |
| D-HVS/PP                                | Carbon nanofiber/S | 9.2 | 905   | 8.3  | 0.237% | 0.2C | 120 | 85 |
| Ce-MOFs/CNT/PP                          | Carbon nanofiber/S | 6.0 | 993.5 | 5.9  | 0.054% | 0.1C | 200 | 61 |
| MOF/PVDF                                | Carbon cloth/S     | 5.8 | 1269  | 7.46 | 0.13%  | 0.1C | 200 | 86 |

Supplementary Table 7. The summary of comparative performance for Li-S batteries at high temperature

| Membrane                                    | Cathode material  | Operation temperature (°C) | Electrochemical Performance                      |                             |                                                 |                 | Electrolyte (LiTFSI) | REF |
|---------------------------------------------|-------------------|----------------------------|--------------------------------------------------|-----------------------------|-------------------------------------------------|-----------------|----------------------|-----|
|                                             |                   |                            | Initial discharge capacity (mAhg <sup>-1</sup> ) | Capacity fade per cycle (%) | Current density (1C = 1675 mA g <sup>-1</sup> ) | Number of cycle |                      |     |
| <i>np</i> -ANF                              | C/S               | 80                         | 1346 ± 40                                        | 0.15%                       | 0.1C                                            | 100             | (DOL+DME)            |     |
| <i>np</i> -ANF                              | C/S               | 80                         | 801 ± 24                                         | 0.081%                      | 3C                                              | 500             | (DOL+DME)            |     |
| C@PI@LZO                                    | C/S               | 80                         | 897.1                                            | 0.2%                        | 5C                                              | 200             | (DOL+DME)            | 87  |
| CuNWs-GN/PI/LLZO                            | C/S               | 80                         | 817.8                                            | 0.24%                       | 0.5Ag <sup>-1</sup>                             | 50              | (DOL+DME)            | 88  |
| PAN@APP                                     | C/S               | 75                         | ~700                                             | 0.220%                      | 1.0C                                            | 100             | (DOL+DME)            | 89  |
| <i>Celgard</i> <sup>TM</sup> 2325           | Carbon nanotube/S | 70                         | ~750                                             | ~0.444%                     | 2.0C                                            | 150             | (DOL+DME)            | 90  |
| <i>Celgard</i> <sup>TM</sup> 2400           | Graphene/BN-S     | 70                         | 1032                                             | 0.047%                      | 2.0C                                            | 300             | (DOL+DME)            | 91  |
| PE                                          | S@pPAN            | 60                         | 820.3                                            | --                          | 0.2C                                            | 200             | (TEP+TTE)            | 92  |
| Li@Nafion/PE/Al <sub>2</sub> O <sub>3</sub> | RGO@S             | 60                         | 1172                                             | 0.059%                      | 0.2C                                            | 500             | (DOL+DME)            | 52  |
| <i>Celgard</i> <sup>TM</sup> 2400           | Porous graphene/S | 60                         | ~590                                             | 0.297%                      | 1.0C                                            | 80              | (DOL+DME)            | 93  |

|                                   |                                                       |    |       |         |                     |     |                                |    |
|-----------------------------------|-------------------------------------------------------|----|-------|---------|---------------------|-----|--------------------------------|----|
| <i>Celgard</i> <sup>TM</sup> 2400 | Alucone coated C/S                                    | 55 | 1065  | 0.152%  | 0.1C                | 300 | LiPF <sub>6</sub> (EC:DEC:EMC) | 94 |
| <i>Celgard</i> <sup>TM</sup> 2400 | S@CNTs/Co <sub>3</sub> S <sub>4</sub> NB <sub>s</sub> | 50 | 953   | 0.082%  | 0.2C                | 300 | (DOL+DME)                      | 95 |
| CNT-COF                           | C/S                                                   | 50 | 450   | 0.16%   | 2.0Ag <sup>-1</sup> | 300 | (DOL+DME)                      | 96 |
| <i>Celgard</i> <sup>TM</sup> 2400 | Mesoporous C/S                                        | 45 | ~1180 | ~4.067% | 0.1C                | 10  | (DOL:DME:BTFE)                 | 97 |
| Tonen polyolefin                  | C/S                                                   | 45 | -     | 0.770%  | 0.1C                | 50  | (DOL+DME)                      | 98 |

Supplementary Table 8. Multiparameter comparison with various modified separator for Li-S batteries in the form of glyph plots.

|                                            | Discharge Capacity 0.1C (mAhg <sup>-1</sup> ) | Discharge Capacity 1C (mAhg <sup>-1</sup> ) | Cycle number | Capacity Retention 1C (%) | CE (%) | Sulfur loading (mg/cm <sup>2</sup> ) | Operational Temperature (°C) | REF |
|--------------------------------------------|-----------------------------------------------|---------------------------------------------|--------------|---------------------------|--------|--------------------------------------|------------------------------|-----|
| <i>This work</i>                           | 1268±38                                       | 889±26                                      | 1500         | 76                        | 98     | 5.8                                  | 80                           |     |
| <i>NANF/Celgard</i>                        | 1270                                          | 760                                         | 800          | 62.4                      | 98     | 5.2                                  | 70                           | 99  |
| <i>PMIA/MOF</i>                            | 1391                                          | 901                                         | 350          | 88                        | 96.9   | 9.23                                 | 80                           | 100 |
| <i>GO/Celgard</i>                          | 1403                                          | 1100                                        | 400          | 32                        | 98     | 1.1                                  | 22                           | 26  |
| <i>N-porous carbon/PP</i>                  | 1257                                          | 851                                         | 500          | 88                        | 98     | 6.0                                  | 22                           | 37  |
| <i>MWCNT/Celgard</i>                       | 1324                                          | 1073                                        | 300          | 47                        | 99     | 1.2                                  | 22                           | 30  |
| <i>Carbon paper/Celgard</i>                | 1367                                          | 1176                                        | 100          | 85                        | 96     | 1.2                                  | 22                           | 35  |
| <i>MoS<sub>2</sub>/Celgard</i>             | 1300                                          | 1007                                        | 2000         | 42                        | 98     | 4.0                                  | 22                           | 78  |
| <i>Red phosphorus/PP</i>                   | 1200                                          | 889                                         | 500          | 82                        | 99     | 5.0                                  | 22                           | 67  |
| <i>Co<sub>9</sub>S<sub>8</sub>/Celgard</i> | 1360                                          | 986                                         | 1500         | 83                        | 98     | 5.6                                  | 22                           | 54  |
| <i>Ni<sub>3</sub>(HITP)<sub>2</sub>/PP</i> | 1186                                          | 879                                         | 500          | 84                        | 99     | 8.0                                  | 22                           | 62  |
| <i>MOF@GO</i>                              | 1072                                          | 612                                         | 1500         | 71                        | 98     | 0.7                                  | 22                           | 59  |
| <i>MnO<sub>2</sub>/graphene/CNTs</i>       | 1259                                          | 960                                         | 2500         | 27.5                      | 99     | 2.37                                 | 22                           | 64  |
| <i>PAN@APP</i>                             | 1310                                          | 815                                         | 400          | 77.8                      | 99     | 1.8                                  | 75                           | 89  |
| <i>Ce-MOFs/CNT/PP</i>                      | 1200                                          | 1021                                        | 800          | 82                        | 99     | 6.0                                  | 22                           | 61  |



|                                                                    |      |      |      |      |    |      |    |    |
|--------------------------------------------------------------------|------|------|------|------|----|------|----|----|
| <i>Li@Nafion/PEP/Al<sub>2</sub>O<sub>3</sub></i>                   | 1398 | 924  | 1000 | 77.2 | 99 | 7.6  | 60 | 52 |
| <i>PZI</i>                                                         | 1095 | 940  | 1000 | 85   | 99 | 5.8  | 25 | 76 |
| <i>Li<sub>4</sub>Ti<sub>5</sub>O<sub>12</sub>/graphene/Celgard</i> | 1408 | 813  | 500  | 85   | 98 | 1.1  | 22 | 55 |
| <i>PEDOT:PSS</i>                                                   | 914  | 748  | 500  | 64.3 | 99 | 2.9  | 22 | 56 |
| <i>PMIA/Celgard</i>                                                | 944  | 773  | 600  | 73   | 98 | 0.6  | 22 | 70 |
| <i>TiO<sub>2</sub>/TiN/Celgard</i>                                 | 1250 | 790  | 2000 | 85   | 99 | 4.3  | 22 | 44 |
| <i>NbN/Celgard</i>                                                 | 1400 | 815  | 300  | 81.7 | 99 | 4.0  | 22 | 46 |
| <i>Nafion/Celgard</i>                                              | 960  | 718  | 500  | 60   | 98 | 0.53 | 22 | 68 |
| <i>C<sub>3</sub>N<sub>4</sub>/Celgard</i>                          | 1200 | 1100 | 500  | 66   | 99 | 5.0  | 22 | 40 |

## SUPPLEMENTARY REFERENCES

1. Picart, C. *et al.* Molecular basis for the explanation of the exponential growth of polyelectrolyte multilayers. *Proc. Natl. Acad. Sci. U. S. A.* **99**, 12531–5 (2002).
2. Porcel, C. *et al.* Influence of the polyelectrolyte molecular weight on exponentially growing multilayer films in the linear regime. *Langmuir* **23**, 1898–904 (2007).
3. Zhu, J., Watts, D. & Kotov, N. A. Gelation-Assisted Layer-by-Layer Deposition of High Performance Nanocomposites. *Zeitschrift für Phys. Chemie* **232**, 1383–1398 (2018).
4. Chen, Y. *et al.* Electrospun PMIA and PVDF-HFP composite nanofibrous membranes with two different structures for improved lithium-ion battery separators. *Solid State Ionics* **347**, 115253 (2020).
5. Sun, J. *et al.* Entrapment of Polysulfides by a Black-Phosphorus-Modified Separator for Lithium–Sulfur Batteries. *Adv. Mater.* **28**, 9797–9803 (2016).
6. Ghazi, Z. A. *et al.* MoS<sub>2</sub>/Celgard separator as efficient polysulfide barrier for long-life lithium–sulfur batteries. *Adv. Mater.* **29**, 1606817 (2017).
7. Patel, A. *et al.* High Modulus, Thermally Stable, and Self-Extinguishing Aramid Nanofiber Separators. *ACS Appl. Mater. Interfaces* **12**, 25756–25766 (2020).
8. Li, J., Tian, W., Yan, H., He, L. & Tuo, X. Preparation and performance of aramid nanofiber membrane for separator of lithium ion battery. *J. Appl. Polym. Sci.* **133**, 43623 (2016).
9. Tung, S. O., Ho, S., Yang, M., Zhang, R. & Kotov, N. A. A dendrite-suppressing composite ion conductor from aramid nanofibres. *Nat. Commun.* **6**, 6152 (2015).
10. Liu, L. *et al.* membranes with 3D aramid nanofiber frameworks for stable all-solid-state lithium metal batteries. *Sci. China Mater.* **63**, 703–718 (2020).

11. Zhu, C. *et al.* Aramid nanofibers/ polyphenylene sulfide nonwoven composite separator fabricated through a facile papermaking method for lithium ion battery. *J. Memb. Sci.* **588**, 117169 (2019).
12. Hao, X. *et al.* Ultrastrong polyoxazole nanofiber membranes for dendrite-proof and Heat-resistant battery separators. *Nano Lett.* **16**, 2981–2987 (2016).
13. Zhang, J. *et al.* Renewable and superior thermal-resistant cellulose-based composite nonwoven as lithium-ion battery separator. *ACS Appl. Mater. Interfaces* **5**, 128–134 (2013).
14. Xu, Q. *et al.* Cellulose/Polysulfonamide Composite Membrane as a High Performance Lithium-Ion Battery Separator. *ACS Sustain. Chem. Eng.* **2**, 194–199 (2014).
15. Song, J. *et al.* Co-polyimide-coated polyethylene separators for enhanced thermal stability of lithium ion batteries. *Electrochim. Acta* **85**, 524–530 (2012).
16. Zhai, Y. *et al.* Sandwich-structured PVdF/PMIA/PVdF nanofibrous separators with robust mechanical strength and thermal stability for lithium ion batteries. *J. Mater. Chem. A* **2**, 14511 (2014).
17. Ansari, Y. *et al.* Low-cost, dendrite-blocking polymer-Sb<sub>2</sub>O<sub>3</sub> separators for lithium and sodium batteries. *J. Electrochem. Soc.* **161**, A1655–A1661 (2014).
18. Ji, G. L., Zhu, B. K., Cui, Z. Y., Zhang, C. F. & Xu, Y. Y. PVDF porous matrix with controlled microstructure prepared by TIPS process as polymer electrolyte for lithium ion battery. *Polymer (Guildf)*. **48**, 6415–6425 (2007).
19. Leo, C. J., Subba Rao, G. V. & Chowdari, B. V. R. Studies on plasticized PEO-lithium triflate-ceramic filler composite electrolyte system. *Solid State Ionics* **148**, 159–171 (2002).
20. Pan, Q., Smith, D. M., Qi, H., Wang, S. & Li, C. Y. Hybrid Electrolytes with Controlled Network Structures for Lithium Metal Batteries. *Adv. Mater.* **27**, 5995–6001 (2015).
21. Gayet, F. *et al.* Unique combination of mechanical strength, thermal stability, and high ion conduction in PMMA - Silica nanocomposites containing high loadings of ionic liquid. *Chem. Mater.* **21**, 5575–5577 (2009).
22. Patel, M., Chandrappa, K. G. & Bhattacharyya, A. J. Increasing ionic conductivity and mechanical strength of a plastic electrolyte by inclusion of a polymer. *Electrochim. Acta* **54**, 209–215 (2008).
23. Lu, Q. *et al.* Dendrite-free, high-rate, long-life lithium metal batteries with a 3D cross-linked network polymer electrolyte. *Adv. Mater.* **29**, 1604460 (2017).
24. Hao, J. *et al.* A novel polyethylene terephthalate nonwoven separator based on electrospinning technique for lithium ion battery. *J. Memb. Sci.* **428**, 11–16 (2013).
25. Yanilmaz, M., Dirican, M. & Zhang, X. Evaluation of electrospun SiO<sub>2</sub>/nylon 6,6 nanofiber membranes as a thermally-stable separator for lithium-ion batteries. *Electrochim. Acta* **133**, 501–508 (2014).
26. Shaibani, M. *et al.* Suppressed Polysulfide Crossover in Li-S Batteries through a High-Flux Graphene Oxide Membrane Supported on a Sulfur Cathode. *ACS Nano* **10**, 7768–7779 (2016).
27. Huang, J.-Q. *et al.* Permselective Graphene Oxide Membrane for Highly Stable and Anti-Self-Discharge Lithium-Sulfur Batteries. *ACS Nano* **9**, 3002–3011 (2015).
28. Li, F. *et al.* A graphene-pure-sulfur sandwich structure for ultrafast, long-life lithium-sulfur batteries. *Adv. Mater.* **26**, 625–631 (2014).

29. Chang, C. H., Chung, S. H. & Manthiram, A. Effective Stabilization of a High-Loading Sulfur Cathode and a Lithium-Metal Anode in Li-S Batteries Utilizing SWCNT-Modulated Separators. *Small* **12**, 174–179 (2016).
30. Chung, S. H. & Manthiram, A. High-performance Li-S batteries with an ultra-lightweight MWCNT-coated separator. *J. Phys. Chem. Lett.* **5**, 1978–1983 (2014).
31. Luo, L., Chung, S. H. & Manthiram, A. A trifunctional multi-walled carbon nanotubes/polyethylene glycol (MWCNT/PEG)-coated separator through a layer-by-layer coating strategy for high-energy Li-S batteries. *J. Mater. Chem. A* **4**, 16805–16811 (2016).
32. Chung, S. H. & Manthiram, A. A polyethylene glycol-supported microporous carbon coating as a polysulfide trap for utilizing pure sulfur cathodes in lithium-sulfur batteries. *Adv. Mater.* **26**, 7352–7357 (2014).
33. Chung, S. H., Han, P., Singhal, R., Kalra, V. & Manthiram, A. Electrochemically Stable Rechargeable Lithium-Sulfur Batteries with a Microporous Carbon Nanofiber Filter for Polysulfide. *Adv. Energy Mater.* **5**, 1–12 (2015).
34. Chung, S. H. & Manthiram, A. Bifunctional separator with a light-weight carbon-coating for dynamically and statically stable lithium-sulfur batteries. *Adv. Funct. Mater.* **24**, 5299–5306 (2014).
35. Su, Y. S. & Manthiram, A. Lithium-sulphur batteries with a microporous carbon paper as a bifunctional interlayer. *Nat. Commun.* **3**, 1166 (2012).
36. Yao, H. *et al.* Improved lithium–sulfur batteries with a conductive coating on the separator to prevent the accumulation of inactive S-related species at the cathode–separator interface. *Energy Environ. Sci.* **7**, 3381–3390 (2014).
37. Pei, F. *et al.* A Two-dimensional porous carbon-modified separator for high-energy-density Li-S batteries. *Joule* **2**, 323–336 (2018).
38. Zhou, X. *et al.* A high-level N-doped porous carbon nanowire modified separator for long-life lithium-sulfur batteries. *J. Electroanal. Chem.* **768**, 55–61 (2016).
39. Chen, G. *et al.* A multifunctional separator modified with cobalt and nitrogen co-doped porous carbon nanofibers for Li–S batteries. *J. Memb. Sci.* **548**, 247–253 (2018).
40. Fan, C. Y. *et al.* The Effective Design of a Polysulfide-Trapped Separator at the Molecular Level for High Energy Density Li-S Batteries. *ACS Appl. Mater. Interfaces* **8**, 16108–16115 (2016).
41. Xiao, Z. *et al.* A lightweight TiO<sub>2</sub>/Graphene interlayer, applied as a highly effective polysulfide absorbent for fast, long-life lithium-sulfur batteries. *Adv. Mater.* **27**, 2891–2898 (2015).
42. Xu, G. *et al.* Absorption mechanism of carbon-nanotube paper-titanium dioxide as a multifunctional barrier material for lithium-sulfur batteries. *Nano Res.* **8**, 3066–3074 (2015).
43. Xu, G. *et al.* A thin multifunctional coating on a separator improves the cyclability and safety of lithium sulfur batteries. *Chem. Sci.* **8**, 6619–6625 (2017).
44. Zhou, T. *et al.* Twinborn TiO<sub>2</sub>-TiN heterostructures enabling smooth trapping-diffusion-conversion of polysulfides towards ultralong life lithium-sulfur batteries. *Energy Environ. Sci.* **10**, 1694–1703 (2017).
45. Qi, B. *et al.* Mesoporous TiN microspheres as an efficient polysulfide barrier for lithium–sulfur batteries. *J. Mater. Chem. A* (2018). doi:10.1039/C8TA04920C

46. Kim, S. *et al.* Simultaneous suppression of shuttle effect and lithium dendrite growth by lightweight bifunctional separator for Li-S batteries. *ACS Applied Energy Mater.* **3**, 2643–2652 (2020).
47. Li, W. *et al.* V<sub>2</sub>O<sub>5</sub> polysulfide anion barrier for long-lived Li-S batteries. *Chem. Mater.* **26**, 3404–3410 (2014).
48. Liu, M. *et al.* Suppressing Self-Discharge and Shuttle Effect of Lithium–Sulfur Batteries with V<sub>2</sub>O<sub>5</sub>-Decorated Carbon Nanofiber Interlayer. *Small* **13**, 1–7 (2017).
49. Zhang, Z., Lai, Y., Zhang, Z., Zhang, K. & Li, J. Al<sub>2</sub>O<sub>3</sub>-coated porous separator for enhanced electrochemical performance of lithium sulfur batteries. *Electrochim. Acta* **129**, 55–61 (2014).
50. Song, R. *et al.* A trilayer separator with dual function for high performance lithium-sulfur batteries. *J. Power Sources* **301**, 179–186 (2016).
51. Xu, Q., Hu, G. C., Bi, H. L. & Xiang, H. F. A trilayer carbon nanotube/Al<sub>2</sub>O<sub>3</sub>/polypropylene separator for lithium-sulfur batteries. *Ionics (Kiel)*. **21**, 981–986 (2015).
52. He, Y., Wu, S., Li, Q. & Zhou, H. Designing a multifunctional separator for high-performance Li-S batteries at elevated temperature. *Small* **15**, 1904332 (2019).
53. Xiang, Y. *et al.* Interfacing soluble polysulfides with a SnO<sub>2</sub> functionalized separator: An efficient approach for improving performance of Li-S battery. *J. Memb. Sci.* **563**, 380–387 (2018).
54. Science, E. Vertical Co<sub>9</sub>S<sub>8</sub> hollow nanowall arrays grown on Celgard separator as a multifunctional polysulfide barrier for high- performance Li-S batteries. (2018). doi:10.1039/x0xx00000x
55. Zhao, Y. *et al.* Dense coating of Li<sub>4</sub>Ti<sub>5</sub>O<sub>12</sub> and graphene mixture on the separator to produce long cycle life of lithium-sulfur battery. *Nano Energy* **30**, 1–8 (2016).
56. Abbas, S. A. *et al.* Bifunctional separator as a polysulfide mediator for highly stable Li-S batteries. *J. Mater. Chem. A* **4**, 9661–9669 (2016).
57. Yan, L. *et al.* Enhanced performance of lithium-sulfur batteries with an ultrathin and lightweight MoS<sub>2</sub>/carbon nanotube interlayer. *J. Power Sources* **389**, 169–177 (2018).
58. Li, M. *et al.* Metal-Organic Framework-Based Separators for Enhancing Li-S Battery Stability: Mechanism of Mitigating Polysulfide Diffusion. *ACS Energy Lett.* **2**, 2362–2367 (2017).
59. Bai, S., Liu, X., Zhu, K., Wu, S. & Zhou, H. Metal-organic framework-based separator for lithium-sulfur batteries. *Nat. Energy* **1**, (2016).
60. Suriyakumar, S., Stephan, A. M., Angulakshmi, N., Hassan, M. H. & Alkordi, M. H. Metal–organic framework@SiO<sub>2</sub> as permselective separator for lithium–sulfur batteries. *J. Mater. Chem. A* (2018). doi:10.1039/C8TA02259C
61. Hong, X. *et al.* Cerium based metal-organic frameworks as an efficient separator coating catalyzing the conversion of polysulfides for high performance lithium-sulfur batteries. *ACS Nano* **13**, 1923–1931 (2019).
62. Zang, Y. *et al.* Large-Area Preparation of Crack-Free Crystalline Microporous Conductive Membrane to Upgrade High Energy Lithium – Sulfur Batteries. *Adv. Energy Mater.* **8**, 1802052 (2018).
63. Liang, X., Rangom, Y., Kwok, C. Y., Pang, Q. & Nazar, L. F. Interwoven MXene

- Nanosheet/Carbon-Nanotube Composites as Li-S Cathode Hosts. *Adv. Mater.* **29**, 1–7 (2017).
64. Kong, W. *et al.* Ultrathin MnO<sub>2</sub>/Graphene Oxide/Carbon Nanotube Interlayer as Efficient Polysulfide-Trapping Shield for High-Performance Li-S Batteries. *Adv. Funct. Mater.* **27**, (2017).
  65. Peng, H. J. *et al.* A Cooperative Interface for Highly Efficient Lithium-Sulfur Batteries. *Adv. Mater.* **28**, 9551–9558 (2016).
  66. Wang, L., Liu, J., Haller, S., Wang, Y. & Xia, Y. A scalable hybrid separator for a high performance lithium-sulfur battery. *Chem. Commun.* **51**, 6996–6999 (2015).
  67. Wang, Z. *et al.* Constructing metal-free and cost-effective multifunctional separator for high-performance lithium-sulfur batteries. *Nano Energy* **59**, 390–398 (2019).
  68. Huang, J.-Q. *et al.* Ionic shield for polysulfides towards highly-stable lithium-sulfur batteries. *Energy Environ. Sci.* **7**, 347–353 (2014).
  69. Zhuang, T. Z. *et al.* Rational Integration of Polypropylene/Graphene Oxide/Nafion as Ternary-Layered Separator to Retard the Shuttle of Polysulfides for Lithium-Sulfur Batteries. *Small* **12**, 381–389 (2016).
  70. Sun, C. *et al.* Integrating flexible PMIA separator and electrode for dealing with multi-aspect issues in Li-S batteries. *Electrochim. Acta* **359**, 136987 (2020).
  71. Deng, N. *et al.* Designing of a phosphorus, nitrogen, and sulfur three-flame retardant applied in a gel poly-m-phenyleneisophthalamide nanofiber membrane for advanced safety lithium-sulfur batteries. *ACS Appl. Mater. Interfaces* **11**, 36705–36716 (2019).
  72. Wang, Y., Zhang, Z., Dong, L. & Jin, Y. Reduced shuttle effect by dual synergism of lithium-sulfur batteries with polydopamine-modified polyimide separators. *J. Memb. Sci.* **595**, 117581 (2020).
  73. Song, S., Shi, L., Lu, S. & Pang, Y. Author's Accepted Manuscript A new polysulfide blocker - Poly (acrylic acid) modified separator for improved performance of lithium-sulfur battery. *J. Memb. Sci.* **563**, 277–283 (2018).
  74. Gu, M. *et al.* Inhibiting the shuttle effect in lithium-sulfur batteries using a layer-by-layer assembled ion-permselective separator. *RSC Adv.* **4**, 46940–46946 (2014).
  75. Li, Y. *et al.* Glass fiber separator coated by porous carbon nanofiber derived from immiscible PAN/PMMA for high-performance lithium-sulfur batteries. *J. Memb. Sci.* **552**, 31–42 (2018).
  76. Li, G. *et al.* Polysulfide Regulation by the Zwitterionic Barrier toward Durable Lithium-Sulfur Batteries. *JACS* **142**, 3583–3592 (2020).
  77. Huang, J. K. *et al.* Functional Two-Dimensional Coordination Polymeric Layer as a Charge Barrier in Li-S Batteries. *ACS Nano* **12**, 836–843 (2018).
  78. Wu, J. *et al.* Ultralight layer-by-layer self-assembled MoS<sub>2</sub>-polymer modified separator for simultaneously trapping polysulfides and suppressing lithium dendrites. *Adv. Energy Mater.* **8**, 1802430 (2018).
  79. Li, S., He, J. & Chen, Y. Vertical Co<sub>9</sub>S<sub>8</sub> hollow nanowall arrays grown on a Celgard separator as a multifunctional polysulfide. *Energy Environ. Sci.* **11**, 2560–2568 (2018).
  80. Zhang, Y. & Wu, H. Interwoven V<sub>2</sub>O<sub>5</sub> nanowire/graphene nanoscroll hybrid assembled as efficient polysulfide-trapping-conversion interlayer for long-life lithium-sulfur batteries. *J. Mater.*

- Chem. A* **6**, 19358–19370 (2018).
81. Song, C. *et al.* 3D catalytic MOF-based nanocomposite as separator coatings for high-performance Li-S battery. *Chem. Eng. J.* **381**, 122701 (2020).
  82. Fan, C. *et al.* The effective design of a polysulfide-trapped separator at the molecular level for high energy density Li-S batteries. *ACS Appl. Mater. Interfaces* **8**, 16108–16115 (2016).
  83. Zhou, C. *et al.* A robust electrospun separator modified with in situ grown metal-organic frameworks for lithium-sulfur batteries. *Chem. Eng. J.* **395**, 124979 (2020).
  84. Lee, S. & Lee, S. Nanomat Li-S batteries based on all-fibrous cathode/separator assemblies and reinforced Li metal anodes: towards ultrahigh energy density and flexibility. *Energy Environ. Sci.* **12**, 177–186 (2019).
  85. Wang, J. *et al.* Suppressing the shuttle effect and dendrite growth in lithium-sulfur batteries. *ACS Nano* **14**, 9819–9831 (2020).
  86. He, Y. *et al.* Simultaneously inhibiting lithium dendrites growth and polysulfides shuttle by a flexible MOF-based membrane in Li-S batteries. *Adv. Energy Mater.* **8**, 1802130 (2018).
  87. Zhou, Z. *et al.* Functionalized polyimide separators enable high performance lithium sulfur batteries at elevated temperature. *J. Power Sources* **396**, 542–550 (2018).
  88. Zhou, Z. *et al.* A multifunctional separator enables safe and durable lithium/magnesium-sulfur batteries under elevated temperature. *Adv. Energy Mater.* **10**, 1902023 (2020).
  89. Lei, T. *et al.* A nonflammable and thermotolerant separator suppresses polysulfide dissolution for safe and long-cycle lithium-sulfur batteries. *Adv. Energy Mater.* 1802441 (2018). doi:10.1002/aenm.201802441
  90. Kim, H., Lee, J. T. & Yushin, G. High temperature stabilization of lithium-sulfur cells with carbon nanotube current collector. *J. Power Sources* **226**, 256–265 (2013).
  91. Deng, D. R. *et al.* Enhanced adsorptions to polysulfides on graphene-supported BN nanosheets with excellent Li-S battery performance in a wide temperature range. *ACS Nano* **12**, 11120–11129 (2018).
  92. Yang, H. *et al.* An intrinsic flame-retardant organic electrolyte for safe lithium-sulfur batteries. *Angew. Chemie Int. Ed.* **131**, 801–805 (2019).
  93. Huang, J., Liu, X. & Zhang, Q. Entrapment of sulfur in hierarchical porous graphene for lithium-sulfur batteries with high rate performance from -40 to 60°C. *Nano Energy* **2**, 314–321 (2013).
  94. Li, X. *et al.* Safe and durable high-temperature lithium-sulfur batteries via molecular layer deposited coating. *Nano Lett.* **16**, 3545–3549 (2016).
  95. Chen, T. *et al.* Self-templated formation of interlaced carbon nanotubes threaded hollow Co<sub>3</sub>S<sub>4</sub> nanoboxes for high-rate and heat-resistant lithium-sulfur batteries. *JACS* **139**, 12710–12715 (2017).
  96. Wang, J., Qin, W., Zhu, X. & Teng, Y. Covalent organic frameworks (COF)/CNT nanocomposite for high performance and wide operating temperature lithium-sulfur batteries. *Energy* doi.org/10.1016/j.energy.2020.117372 (2020). doi:10.1016/j.energy.2020.117372
  97. Gordin, M. L. *et al.* Bis(2,2,2-trifluoroethyl) ether as an electrolyte co-solvent for mitigating self-discharge in lithium-sulfur batteries. *ACS Appl. Mater. Interface* **6**, 8006–8010 (2014).

98. Rolf, M. *et al.* Systematical electrochemical study on the parasitic shuttle-effect in lithium-sulfur-cells at different temperatures and different rates. *J. Power Sources* **259**, 289–299 (2014).
99. Zheng, S., Zhang, H., Fan, J., Xu, Q. & Min, Y. Improving Electrochemical Performance and Safety of Lithium-Sulfur Batteries by a “ Bulletproof Vest ”. *ACS Appl. Mater. Interfaces* **12**, 51904–51916 (2020).
100. Liu, J. *et al.* A high-safety and multifunctional MOFs modified aramid nanofiber separator for lithium-sulfur batteries. *Chem. Eng. J.* **411**, 128540 (2021).
